# Supplementary material for: Lack of Association between Serum Chitotriosidase Activity and Arterial Stiffness in Type 2 Diabetes without Cardiovascular Complications
Source: MDPI journal article supplement (doi:10.3390/ijms242115809), 2023-10-31
Supplement: s1 [file s1]

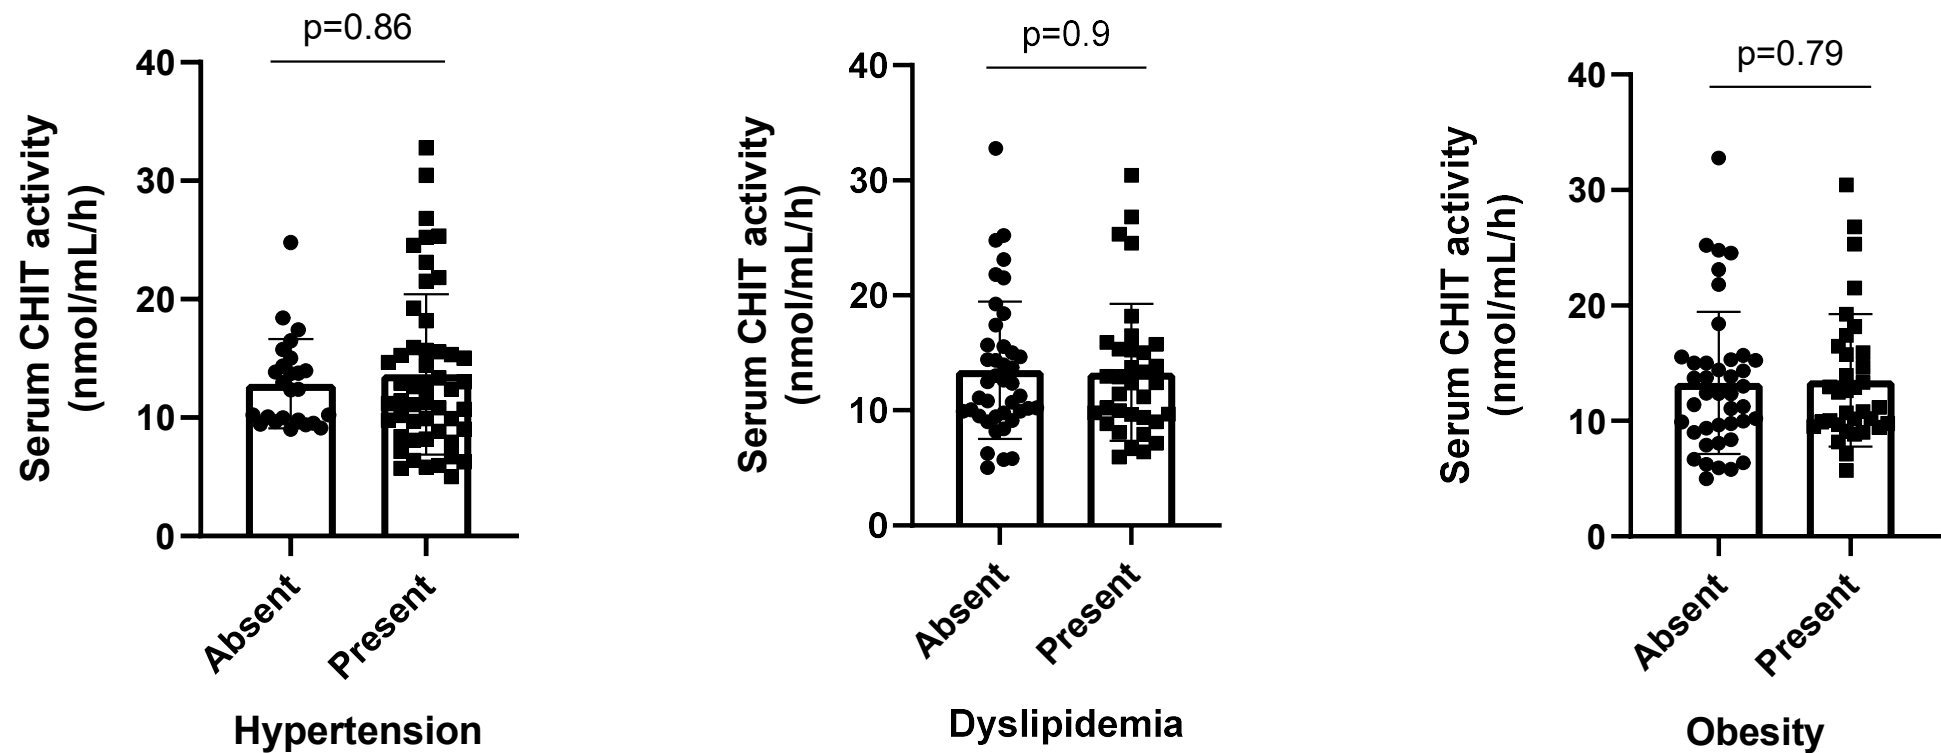

**Supplementary Figure 1.** Difference in CHIT activity stratifying the study population according to the presence of hypertension, dyslipidemia or obesity. *CHIT*, chitotriosidase.
