# Supplementary figures and images for: Lack of Association between Serum Chitotriosidase Activity and Arterial Stiffness in Type 2 Diabetes without Cardiovascular Complications
Source: MDPI journal article supplement (doi:10.3390/ijms242115809), 2023-10-31

Supplementary Figure 2

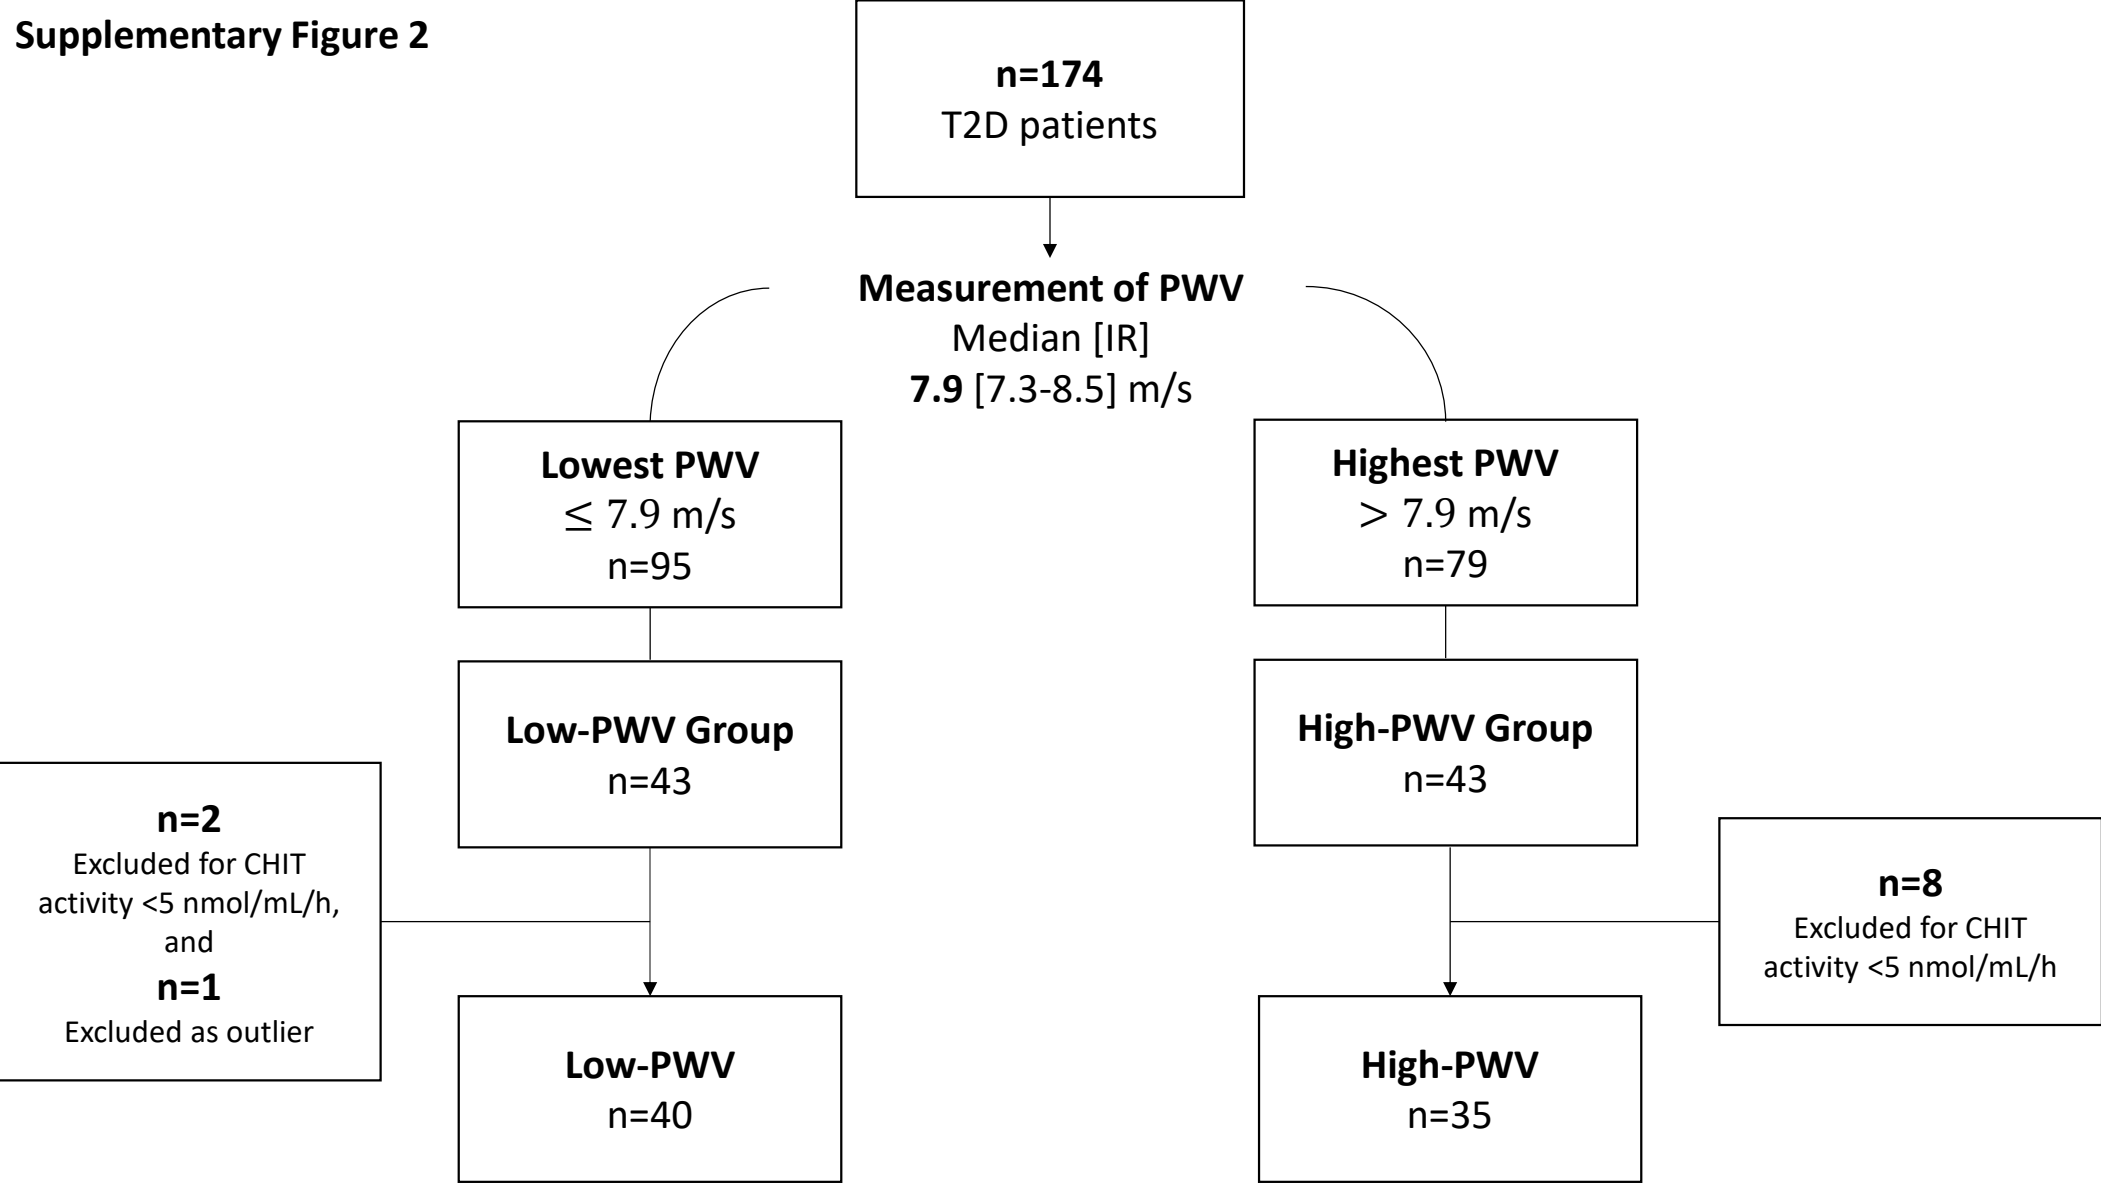

Supplement: s1 [file s1]
